# Supplementary material for: Modelling the Impact of Chronic Cigarette Smoke Exposure in Obese Mice: Metabolic, Pulmonary, Intestinal, and Cardiac Issues
Source: PubMed Central journal article supplement (PMC7175208; doi:10.3390/nu12030827), 2020-03-20
Supplement: nutrients-12-00827-s001.pdf [file nutrients-12-00827-s001.pdf]

SUPPLEMENTARY MATERIALS

# Modelling the impact of chronic cigarette smoke exposure in obese mice: metabolic, pulmonary, intestinal, and cardiac issues

Emilie Dubois-Deruy<sup>1#</sup>, Gaëlle Rémy<sup>2#</sup>, Jeanne Alard<sup>2</sup>, Gwenola Kervoaze<sup>2</sup>, Maggy Chwastyniak<sup>1</sup>, Morgane Baron<sup>2</sup>, Delphine Beury<sup>2</sup>, Léa Siegwald<sup>2</sup>, Ségolène Caboche<sup>2</sup>, David Hot<sup>2</sup>, Philippe Gosset<sup>2</sup>, Corinne Granette<sup>2</sup>, Florence Pinet<sup>1</sup>, Isabelle Wolowczuk<sup>2</sup> and Muriel Pichavant<sup>2\*</sup>

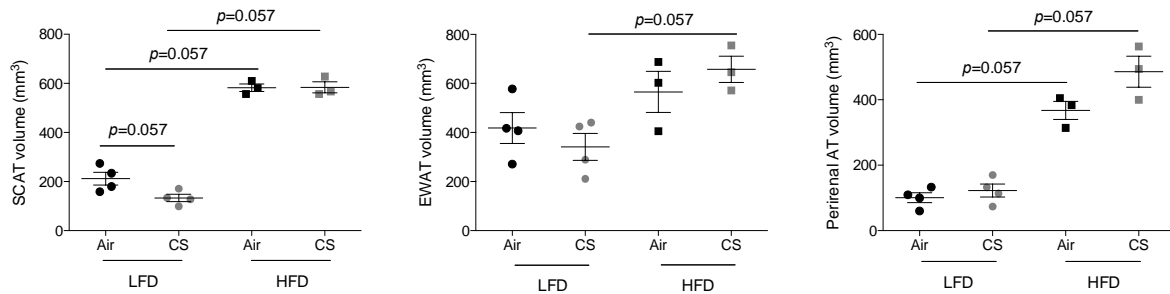

**Figure S1: Fat depot distribution in lean and obese mice chronically exposed to cigarette smoke.** Magnetic resonance imaging (MRI) was used to draw longitudinal slices of lean (LFD) and obese (HFD) mice exposed to Air or to CS. The manual labeling of the different fat depots was performed using the segmentation tool ITK-SNAP, and SCAT, EWAT and peri-renal adipose tissue volumes were calculated using the implementation of ITK-SNAP (n = 3-4 mice per group). Data are expressed as individual and mean ± SEM values.

**Table S1: Disease scoring of lung remodeling.**

| Lesion distribution             | No Lesion       | 1 to 25% of parenchyma | 26 to 50% of parenchyma | 51 to 75% of parenchyma | > 75% of parenchyma |
|---------------------------------|-----------------|------------------------|-------------------------|-------------------------|---------------------|
| Score                           | 0               | 1                      | 2                       | 3                       | 4                   |
| Alveolar wall thickness         | < 1 erythrocyte | 1 to 2 erythrocytes    | 3 to 5 erythrocytes     | 6 to 10 erythrocytes    | > 10 erythrocytes   |
| Score                           | 0               | 1                      | 2                       | 3                       | 4                   |
| Hyaline membrane                | no              |                        |                         | yes                     |                     |
| Score                           | 0               |                        |                         | 1                       |                     |
| Alveolar inflammation (PNN)     | Absent          | < 10 / HP field        | 10 to 20 / HP field     | 21 to 50 / HP field     | > 50 / HP field     |
| Score                           | 0               | 1                      | 2                       | 3                       | 4                   |
| Alveolar suppuration            | no              |                        |                         | yes                     |                     |
| Score                           | 0               |                        |                         | 1                       |                     |
| Bronchiolar epithelium necrosis | no              |                        |                         | yes                     |                     |
| Score                           | 0               |                        |                         | 1                       |                     |
| Peribronchiolar                 | Absent          | < 10 / HP              | 10 to 20 /              | 21 to 50 /              | > 50 / HP           |

|                                                                |        |                    |                        |                        |                    |
|----------------------------------------------------------------|--------|--------------------|------------------------|------------------------|--------------------|
| <b>inflammation,<br/>PNN</b>                                   |        | field              | HP field               | HP field               | field              |
| Score                                                          | 0      | 1                  | 2                      | 3                      | 4                  |
| <b>Peribronchiolar<br/>inflammation,<br/>mononuclear cells</b> | Absent | < 10 / HP<br>field | 10 to 20 /<br>HP field | 21 to 50 /<br>HP field | > 50 / HP<br>field |
| Score                                                          | 0      | 1                  | 2                      | 3                      | 4                  |
| <b>Vasculitis</b>                                              | no     |                    |                        | yes                    |                    |
| Score                                                          | 0      |                    |                        | 1                      |                    |
| <b>Fibrinoid necrosis<br/>of vascular wall</b>                 | no     |                    |                        | yes                    |                    |
| Score                                                          | 0      |                    |                        | 1                      |                    |

Randomly selected areas of lung sections were analyzed (see Figure S2a).

The score calculated from the distribution and type of lesions is highlighted in grey. HP: high power (400x).

**Table S2:** Relative abundance of caecal bacteria in lean (LFD) and obese (HFD) mice exposed or not (Air) to cigarette smoke (CS).

| Taxonomy                      | LFD                               |                                      | HFD                               |                                   |             | P value                                                                                                |
|-------------------------------|-----------------------------------|--------------------------------------|-----------------------------------|-----------------------------------|-------------|--------------------------------------------------------------------------------------------------------|
|                               | Air                               | CS                                   | Air                               | CS                                |             |                                                                                                        |
| <b>Actinobacteria phylum</b>  | <b>4.86 ± 0.85<sup>a</sup></b>    | <b>2.32 ± 0.74<sup>a,b</sup></b>     | 2.21 ± 0.80                       | <b>0.16 ± 0.07<sup>b</sup></b>    |             | 0.038 <sup>a</sup> , 0.028 <sup>b</sup>                                                                |
| Coriobacteriaceae Family      | 0.00 ± 0.00                       | 0.00 ± 0.00                          | <b>1.86 ± 0.63</b>                | <b>0.00 ± 0.00</b>                |             | 0.033                                                                                                  |
| Bifidobacteriaceae Family     |                                   |                                      |                                   |                                   |             |                                                                                                        |
| <i>Bifidobacterium</i> Genus  | <b>4.70 ± 0.87<sup>a</sup></b>    | <b>2.22 ± 0.68<sup>b</sup></b>       | <b>0.38 ± 0.22<sup>a</sup></b>    | <b>0.00 ± 0.00<sup>b</sup></b>    |             | 0.029 <sup>a</sup> , 0.015 <sup>b</sup>                                                                |
| <b>Bacteroidetes phylum</b>   | 14.25 ± 3.80                      | 8.40 ± 1.54                          | 12.44 ± 6.78                      | 10.84 ± 3.77                      |             |                                                                                                        |
| <b>Deferribacteres phylum</b> | <b>0.00 ± 0.00<sup>a</sup></b>    | <b>0.94 ± 0.26<sup>a,c</sup></b>     | <b>0.00 ± 0.00<sup>b</sup></b>    | <b>0.90 ± 0.28<sup>b</sup></b>    |             | 0.038 <sup>a</sup> , 0.038 <sup>b</sup> , 0.009 <sup>c</sup>                                           |
| <b>Firmicutes phylum</b>      | 52.43 ± 3.08                      | <b>65.14 ± 3.69<sup>a</sup></b>      | 63.89 ± 6.75                      | 66.75 ± 4.01                      |             | 0.041 <sup>a</sup>                                                                                     |
| Clostridia Class              | 26.17 ± 2.02                      | 33.25 ± 2.46                         | 37.81 ± 0.05                      | 42.28 ± 2.52                      |             |                                                                                                        |
| Ruminococcaceae Family        | 4.40 ± 0.52                       | <b>4.16 ± 0.35<sup>a</sup></b>       | 3.51 ± 0.28                       | 4.70 ± 0.87                       |             | 0.002 <sup>a</sup>                                                                                     |
| Clostridiaceae Family         | 2.49 ± 1.41                       | <b>5.77 ± 0.98<sup>a, b</sup></b>    | 7.66 ± 1.43                       | <b>9.01 ± 0.76<sup>b</sup></b>    |             | 0.002 <sup>a</sup> , 0.026 <sup>b</sup>                                                                |
| Peptostreptococcaceae Family  | <b>1.10 ± 0.70<sup>a</sup></b>    | <b>4.34 ± 0.46<sup>a, b, c</sup></b> | 5.09 ± 0.74                       | <b>6.06 ± 0.38<sup>c</sup></b>    |             | 0.019 <sup>a</sup> , 0.004 <sup>b</sup> , 0.015 <sup>c</sup>                                           |
| <b>Proteobacteria phylum</b>  | 20.07 ± 2.11                      | <b>15.46 ± 2.01<sup>a</sup></b>      | 10.61 ± 1.90                      | 13.60 ± 1.02                      |             | 0.004 <sup>a</sup>                                                                                     |
| Deltaproteobacteria Class     |                                   |                                      |                                   |                                   |             |                                                                                                        |
| Desulfovibrionaceae Family    | <b>6.42 ± 0.86<sup>a</sup></b>    | <b>4.18 ± 0.20<sup>a, b</sup></b>    | 3.79 ± 0.73                       | 4.47 ± 0.35                       |             | 0.019 <sup>a</sup> , 0.002 <sup>b</sup>                                                                |
| Desulfovibrio genus           | <b>3.71 ± 0.34<sup>a, d</sup></b> | <b>2.70 ± 0.06<sup>a, c, e</sup></b> | <b>0.00 ± 0.00<sup>b, d</sup></b> | <b>1.62 ± 0.23<sup>b, e</sup></b> |             | 0.016 <sup>a</sup> , 0.010 <sup>b</sup> , 0.004 <sup>c</sup> , 0.029 <sup>d</sup> , 0.009 <sup>e</sup> |
| <b>Tenericutes phylum</b>     | 0.16 ± 0.16                       | 0.19 ± 0.09                          | 0.21 ± 0.15                       | 0.00 ± 0.00                       | 0.00 ± 0.00 | 0.00 ± 0.00                                                                                            |
| <b>TM7 phylum</b>             | <b>1.87 ± 0.13<sup>a</sup></b>    | <b>2.76 ± 0.21<sup>a, b</sup></b>    | 1.09 ± 0.63                       | 2.59 ± 0.40                       |             | 0.010 <sup>a</sup> , 0.041 <sup>b</sup>                                                                |
| <b>Unclassified phylum</b>    | 4.74 ± 0.48                       | <b>3.98 ± 0.16</b>                   | 5.10 ± 0.30                       | <b>4.87 ± 0.29</b>                | 4.96 ± 0.31 | 0.015                                                                                                  |

Data are expressed as mean ± SEM values. Data significantly different between groups are marked in bold. *P* values are only indicated for significantly different data with an uppercase letter corresponding to the group analyzed.
